# Supplementary material for: Longitudinal Associations Between School-, Staff-, and Student-Level Factors with Student Mental Health and Wellbeing
Source: Research Square preprint supplement (doi:10.21203/rs.3.rs-7341749/v1), 2025-09-11
Supplement: Supplementary file 1 [file c4b1d29938a73d0cac5182cd.docx]

**Supplementary Table 1. Descriptive characteristics of schools.**

| **Characteristics of the Student Body (%)** |  |
| --- | --- |
| Percentage of CALD students in 2020 | 23.9 |
| Percentage of CALD students in 2021 | 24.1 |
| Percentage of Indigenous students in 2020 | 7.3 |
| Percentage of Indigenous students in 2021 | 7.5 |
| School attendance rate 2021 | 87.4 |
| **School administrative characteristics** |  |
| Gross income per student 2020 | 18,859.13 |
| Gross income per student 2021 | 19,328.31 |
| Student/teacher ratio 2020 | 12.52 |
| Student/teacher ratio 2021 | 13.36 |
| **Socioeconomic advantage (ICSEA), n (%)** |  |
| Below median | 20 (57.1) |
| Above median | 15 (42.9) |
| **Geographic location, n (%)** |  |
| Metropolitan area | 18 (51.1) |
| Regional area | 17 (48.9) |
| **School Sector, n (%)** |  |
| Government school | 29 (82.8) |
| Non-government school | 6 (17.2) |
| **School Gender, n (%)** |  |
| Coeducation | 30 (85.7) |
| Boys’ Only and Girls’ Only | 5 (14.3) |

*Note*: *N*=35 schools. Gross income per student is reported in Australian dollars (AUD). Key: CALD = culturally and linguistically diverse, ICSEA = Index of Community Socio-educational Advantage.

| **Variable** | ***B*** | ***OR*** | ***95% CI*** | | ***p*** |
| --- | --- | --- | --- | --- | --- |
|  |  |  | **Lower** | **Upper** |  |
| *Location/Regional Characteristics* |  |  |  |  |  |
| Metro vs. Regional | -0.07 | 0.94 | 0.57 | 1.54 | .941 |
| IRSAD | 0.07 | 1.07 | 1.00 | 1.15 | .152 |
| *School Administration Characteristics* |  |  |  |  |  |
| Government vs. Non-government | 0.04 | 1.04 | 0.72 | 1.50 | .949 |
| Coeducational vs. Single Gender | 0.45 | 1.57 | 0.96 | 2.56 | .158 |
| Income Per Student | 0.08 | 1.08 | 1.00 | 1.16 | .152 |
| Student Teacher Ratio | 0.12 | 1.13 | 0.99 | 1.29 | .158 |
| ICSEA | 0.00 | 1.00 | 1.00 | 1.00 | .061 |
| *Student Body Characteristics* |  |  |  |  |  |
| Percent Indigenous | -0.01 | 0.99 | 0.96 | 1.02 | .724 |
| Percent CALD | 0.00 | 1.00 | 0.99 | 1.01 | .979 |
| Attendance | 0.03 | 1.03 | 0.97 | 1.09 | .584 |
| *Student Rated School Culture* |  |  |  |  |  |
| School Connectedness | 0.02 | 1.02 | 0.99 | 1.06 | .442 |
| School Climate | 0.06 | 1.06 | 1.02 | 1.10 | .009 |
| *Teacher Rated School Culture* |  |  |  |  |  |
| Promotion of Wellbeing | 0.02 | 1.04 | 1.00 | 1.09 | .158 |
| School Culture | -0.18 | 0.84 | 0.46 | 1.52 | .724 |
| *Mental Health and Wellbeing* |  |  |  |  |  |
| Baseline Distress | -0.00 | 1.00 | 0.97 | 1.03 | .980 |
| Baseline Wellbeing | 0.04 | 1.04 | 1.01 | 1.06 | .038 |
| *Covariates* |  |  |  |  |  |
| Mental Health History | -0.74 | 0.48 | 0.33 | 0.69 | <.001 |
| Male Gender | -0.20 | 0.82 | 0.60 | 1.12 | .412 |
| Other Gender | 0.22 | 1.25 | 0.68 | 2.28 | .687 |

**Supplementary Table 2.** **Results of logistic regressions assessing predictors of attrition.**

*Note*: Female gender is the reference group for the male/other gender identity dummy coded covariates.
